# Supplementary material
Source: Research Square preprint supplement (doi:10.21203/rs.3.rs-9825216/v1)
Supplement: Supplementary file 1 [file 68e684a7c6de7358e37968f6.docx]

Supplementary Table 1. Median (Q1-Q3) of Inter-bout duration statistics for women and men with Low (0-6p), Moderate (7-9p), and High (10-12p) SPPB scores.

|  | **Women (n=691)** | | | **Men (n=575)** | | |
| --- | --- | --- | --- | --- | --- | --- |
| **Low** | **Moderate** | **High** | **Low** | **Moderate** | **High** |
| **Inter-bout duration** | **Median (Q1-Q3**a**)** | **Median (Q1-Q3**a**)** | **Median (Q1-Q3**a**)** | **Median (Q1-Q3**a**)** | **Median (Q1-Q3**a**)** | **Median (Q1-Q3**a**)** |
| Median, seconds | 79.3  (37.7-208.2) | 35.6  (25.6-49.5) | 26.8  (22.3-32.7) | 61.1  (36.9-169.0) | 30.5  (25.8-42.1) | 24.9 *  (20.5-32.3) |
| IQRb, seconds | 431.3   (217.6-3192.1) | 143.2 (93.4-193.2) | 93.9  (72.3-117.9) | 461.1 (178.1-1664.5) | 120.2 (88.5-154.1) | 86.4 *  (64.8-119.8) |
| 95th percentile, minutes | 84.1  (44.8-193.0) | 24.7  (15.1-36.0) | 14.6  (10.5-19.5) | 89.3  (38.4-161.1) | 23.9  (17.1-32.3) | 15.6 *  (11.4-22.5) |
| Maximum, minutes | 310.4 (212.4-489.1) | 186.8 (156.4-250.2) | 176.5 (144.8-215.7) | 280.8 (204.5-390.2) | 201.1 (157.5-246.4) | 170.6 * (137.8-206.1) |

aQ1-Q3: 25th-75th percentiles.
bIQR: Inter-quartile range.
*Significant difference between women and men, tested using Mann-Whitney U tests (p<0.05).
